# Supplementary material for: A comparative evaluation of hybrid error correction methods for error-prone long reads
Source: Genome Biol. 2019 Feb 4;20:26. doi: 10.1186/s13059-018-1605-z (PMC6362602; doi:10.1186/s13059-018-1605-z)
Supplement: Supplementary file 5 — Table S3. Performance statistics on output rate. a. Output rate (%) performance statistics on PacBio data of ten methods using five SR coverages. b. Output rate (%) performance statistics on ONT data of ten methods using five SR coverages. (XLSX 19 kb) [file 13059_2018_1605_MOESM5_ESM.xlsx]

## Sheet: Index
Table S3. Peformance statistics on output rate
This file contains multiple sheets with each corresponding to one supplementary table.
S3a. output rate on PacBio	Supplementary Table S3a. Output rate (%) performance statistics on PacBio data of ten methods using five SR coverages
S3b. output rate on ONT	Supplementary Table S3b. Output rate (%) performance statistics on ONT data of ten methods using five SR coverages

## Sheet: S3a. output rate on PacBio
	Table S3a. Output rate (%) performance statistics on PacBio data of ten methods using five SR coverages
	Organism	SR coverage	FMLRC	Jabba	LoRDEC	HALC	CoLoRMap	ECTools	LSC	Nanocorr	pacBioToCA	proovread
	E. coli	5x	100	58.45	100	100	100	1.28	96.1	94.91	21.53	99.85
		20x	100	83.43	100	100	100	72.38	96.86	95.56	21.54	99.85
		50x	100	88.18	100	100	100	73	97.07	95.7	21.57	99.85
		75x	100	88.22	100	100	100	72.97	97.11	95.56	21.6	99.85
		100x	100	88.35	100	100	100	72.95	97.16	94.99	21.63	99.85
	S. cerevisae	5x	100	15.5	99.997	100	100	0.4	94.17	92.84	20.91	99.16
		20x	100	58.27	99.997	100	100	51.32	95.58	94.7	20.98	99.17
		50x	100	79.32	99.997	100	100	59.24	96.08	95.2	21.01	NA
		75x	100	82.59	99.997	100	100	59.37	96.22	95.33	NA	NA
		100x	100	83.04	99.997	100	100	59.65	96.3	95.4	NA	NA
	D. melanogaster	5x	100	18.91	99.998	100	100	NA	NA	NA	NA	NA
		20x	100	29.86	99.998	100	100	NA	NA	NA	NA	NA
		50x	100	31.66	99.998	100	100	NA	NA	NA	NA	NA
		75x	100	31.53	99.998	100	100	NA	NA	NA	NA	NA
		100x	100	30.4	99.998	100	100	NA	NA	NA	NA	NA
	A. thaliana	5x	100	17.59	99.999	100	100	NA	NA	NA	NA	NA
		20x	100	30.37	99.999	100	100	NA	NA	NA	NA	NA
		50x	100	32.74	99.999	100	100	NA	NA	NA	NA	NA
		75x	100	32.77	99.999	100	100	NA	NA	NA	NA	NA
		100x	100	32.72	99.999	100	100	NA	NA	NA	NA	NA
	*The best performances are highlighted in bold.

## Sheet: S3b. output rate on ONT
	Table S3b. Output rate (%) performance statistics on ONT data of ten methods using five SR coverages
	Organism	SR coverage	FMLRC	Jabba	LoRDEC	HALC	CoLoRMap	ECTools	LSC	Nanocorr	pacBioToCA	proovread
	E. coli	5x	100	55.2241	99.933	100	100	0.941241	63.8412	70.7648	22.0281	98.7599
		20x	100	69.6759	99.933	100	100	61.5826	65.4661	72.1509	22.4386	98.7599
		50x	100	76.9327	99.933	100	100	62.3572	66.117	72.4979	22.6499	98.7599
		75x	100	77.3999	99.933	100	100	62.3383	66.3266	72.6113	22.8062	98.7599
		100x	100	77.5407	99.933	100	100	62.3297	66.4279	72.6027	23.0054	98.7599
	S. cerevisae	5x	100	9.94253	99.9945	99.9945	100	0.218505	49.315	49.5422	18.3812	97.7691
		20x	100	37.0355	99.9945	99.9945	100	33.5427	52.9449	53.0886	19.0405	97.7691
		50x	100	50.3414	99.9945	99.9945	100	39.7789	54.3963	54.3335	NA	97.7691
		75x	100	55.4424	99.9945	99.9945	100	40.2503	54.7935	54.6815	NA	97.7947
		100x	100	56.4902	99.9945	99.9945	100	40.9796	55.1016	54.8699	19.3874	97.7691
	*The best performances are highlighted in bold.
	**LRs with lengths >500kb were not processed by LoRDEC and HALC (0.005%).
