# Supplementary material for: A comparative evaluation of hybrid error correction methods for error-prone long reads
Source: Genome Biol. 2019 Feb 4;20:26. doi: 10.1186/s13059-018-1605-z (PMC6362602; doi:10.1186/s13059-018-1605-z)
Supplement: Supplementary file 11 — Table S9. Memory usage performance statistics by the preprocessing modules of five error correction methods (unit: G). (XLSX 14 kb) [file 13059_2018_1605_MOESM11_ESM.xlsx]

## Sheet: S9. preprocessing modules
	Table S9. Memory usage performance statistics by the preprocessing modules of five error correction methods (unit: G)
	Organism	SR coverage	Methods	FMLRC	Jabba	LoRDEC	HALC	ECTools**
			Preprocessing modules	ropebwt2 & msbwt	Karect*	GATB	SOAP-denovo2	Celera Assembler
	E. coli	5x		0.2	2	1	5	6
		20x		1	7	2	16	11
		50x		2	17	2	22	11
		75x		2	26	2	23	12
		100x		3	34	3	23	12
	S. cerevisae	5x		1	5	2	14	8
		20x		2	20	2	19	11
		50x		5	54	3	23	11
		75x		8	80	4	29	15
		100x		10	106	4	29	19
	D. melanogaster	5x		6	NA	6	46	NA
		20x		21	NA	8	72	NA
		50x		51	NA	9	123	NA
		75x		73	NA	10	123	NA
		100x		72	NA	10	123	NA
	A. thaliana	5x		5	NA	5	46	NA
		20x		18	NA	8	72	NA
		50x		42	NA	9	72	NA
		75x		63	NA	9	123	NA
		100x		72	NA	10	123	NA
	*Karect was memory-consuming and failed on large datasets.
	**ECTools itself was time-consuming and hence not applied to large datasets.
